# Supplementary material for: Streptococcus gallolyticus subsp. gallolyticus promotes colorectal tumor development
Source: PubMed Central journal article supplement (PMC5509344; doi:10.1371/journal.ppat.1006440), 2017-07-13
Supplement: ppat.1006440.s012.pdf [file ppat.1006440.s012.pdf]

**Saline**

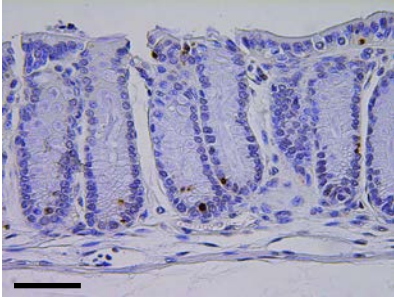

***L. lactis***

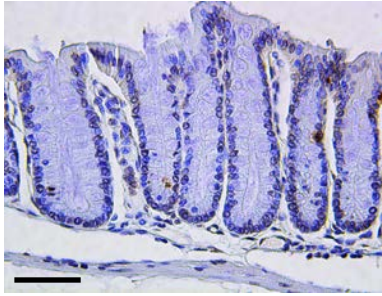

**TX20005**

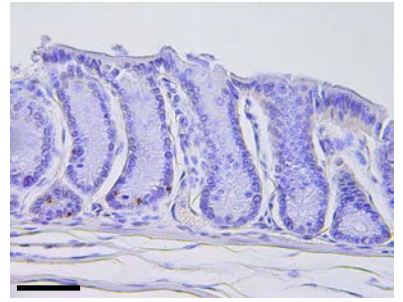

**S12 Fig**
