# Supplementary material for: Streptococcus gallolyticus subsp. gallolyticus promotes colorectal tumor development
Source: PubMed Central journal article supplement (PMC5509344; doi:10.1371/journal.ppat.1006440), 2017-07-13
Supplement: ppat.1006440.s016.pdf [file ppat.1006440.s016.pdf]

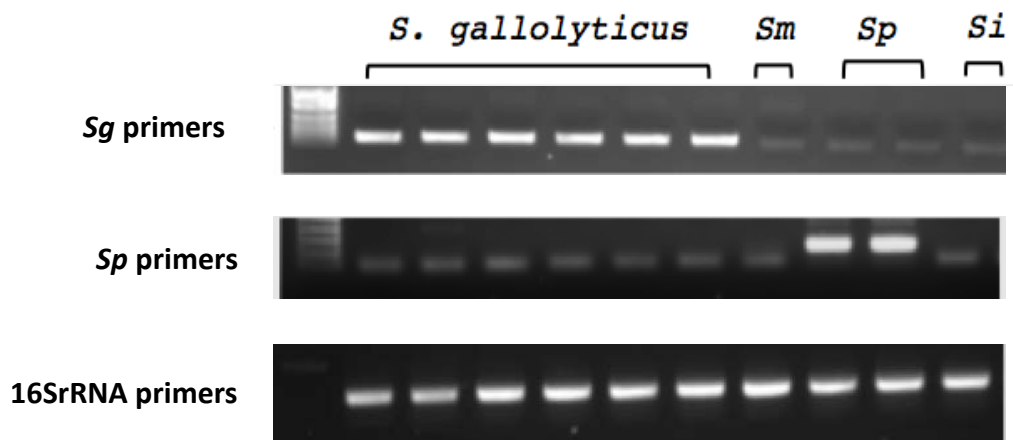

**S16 Fig**
